# Supplementary material for: Hepatocyte ALOXE3 is induced during adaptive fasting and enhances insulin sensitivity by activating hepatic PPARγ
Source: PubMed Central journal article supplement (PMC6141168; doi:10.1172/jci.insight.120794), 2018-08-23
Supplement: jciinsight-3-120794-s011.pdf [file jciinsight-3-120794-s011.pdf]

| <b>Target</b>   | <b>Forward Primer Sequence (5' – 3')</b> | <b>Reverse Primer Sequence (5' – 3')</b> |
|-----------------|------------------------------------------|------------------------------------------|
| <i>Aloxe3</i>   | ATGGCAGTATATCGGCTGTGT                    | GCTTCTGCTTAGGGCTTTCAC                    |
| <i>Alox5</i>    | AGCATGAAAGCAAGGCGCATA                    | GTACGCATCTACGCAGTTCTG                    |
| <i>Alox12</i>   | TCCCTCAACCTAGTGCGTTTG                    | GTTGCAGCTCCAGTTTCGC                      |
| <i>Alox15</i>   | GGCTCCAACAACGAGGTCTAC                    | AGGTATTCTGACACATCCACCTT                  |
| <i>Fasn</i>     | GGAGGTGGTGATAGCCGGTAT                    | TGGGTAATCCATAGAGCCCAG                    |
| <i>Fsp27</i>    | GCCCCATCAGAACAGCGCA                      | GCCTTCACGTTCCAGGCAGCCA                   |
| <i>Hnf4a</i>    | ATGCGACTCTCTAAAACCCTTG                   | ACCTTCAGATGGGGACGTGT                     |
| <i>Ii1b</i>     | GCAACTGTTCTGAACTCAACT                    | ATCTTTTGGGGTCCGTCAACT                    |
| <i>Pck1</i>     | GATGGGCATATCTGTGCTGG                     | CAGCCACCCTTCCTCCTTAG                     |
| <i>Ppargc1a</i> | ACACCGCAATTCTCCCTTGT                     | CGGCGCTCTTCAATTGCTTT                     |
| <i>Ppara</i>    | TGGTTCCTGGTGCCGATTTA                     | ACTAGCATCCCCTTAATTATGTATCT               |
| <i>Scd1</i>     | ACGCCGACCCTCACAATTC                      | CAGTTTTCCGCCCTTCTCTTT                    |
| <i>Sirt1</i>    | TGCTGGCCTAATAGACTTGCA                    | GCACCGTGGAATATGTAACGA                    |
| <i>Tnfa</i>     | CAGGCGGTGCCTATGTCTC                      | CGATCACCCCGAAGTTCAGTAG                   |

Supplemental Table 1. Primer sequences used for qRT-PCR
